# Supplementary material
Source: PubMed Central journal article supplement (PMC3590033)
Supplement: supp_kws200_kws200_Web_Tables.pdf [file supp_kws200_kws200_Web_Tables.pdf]

**Web Table 1. Sensitivity analysis of stricter definition of Types I and II endometrial carcinoma in the NIH-AARP Diet and Health Study, 1995-2006**

|                                            |                                                                     | Subtypes <sup>a</sup>                      |                                            | P <sub>heterogeneity</sub> <sup>c</sup> |
|--------------------------------------------|---------------------------------------------------------------------|--------------------------------------------|--------------------------------------------|-----------------------------------------|
|                                            |                                                                     | Type I (n=864)<br>RR (95% CI) <sup>b</sup> | Type II (n=90)<br>RR (95% CI) <sup>b</sup> |                                         |
| Age at menarche (years)                    | ≥15 vs. <13                                                         | 0.77 (0.59,1.00)                           | 0.60 (0.25,1.40)                           | 0.41                                    |
| Age at menopause (years)                   | ≥55 vs. <45                                                         | 2.26 (1.68,3.05)                           | 1.04 (0.39,2.80)                           | 0.16                                    |
| Menopausal hormone therapy                 | Ever vs. never user                                                 | 1.15 (0.99,1.33)                           | 0.72 (0.45,1.17)                           | 0.003                                   |
| Duration of menopausal hormone therapy use | ≥10 years vs. never user                                            | 2.07 (1.68,2.55)                           | 1.11 (0.52,2.38)                           | 0.01                                    |
| Oral contraceptive use                     | Ever vs. never user                                                 | 0.70 (0.60,0.82)                           | 0.52 (0.31,0.88)                           | 0.10                                    |
| Duration of oral contraceptive use         | ≥10 years vs. never user                                            | 0.60 (0.46,0.79)                           | 0.51 (0.20,1.30)                           | 0.11                                    |
| Parous                                     | Parous vs. nulliparous                                              | 0.68 (0.58,0.80)                           | 0.85 (0.51,1.41)                           | 0.66                                    |
| Age at first birth (years)                 | >30 vs. nulliparous                                                 | 0.60 (0.44,0.82)                           | 0.51 (0.17,1.50)                           | 0.46                                    |
| Parity (births)                            | ≥ 3 vs. nulliparous                                                 | 0.64 (0.54,0.77)                           | 0.79 (0.45,1.38)                           | 0.60                                    |
| Race                                       | Black vs. white                                                     | 0.57 (0.39,0.84)                           | 2.66 (1.39,5.11)                           | 0.001                                   |
| Education                                  | ≥ High school vs. <high school                                      | 1.07 (0.92,1.25)                           | 0.85 (0.54,1.34)                           | 0.16                                    |
| Body mass index (kg/m <sup>2</sup> )       | ≥ 30 vs. <30                                                        | 2.88 (2.51,3.31)                           | 1.77 (1.13,2.77)                           | 0.001                                   |
| Frequency of vigorous physical activity    | 3+ times/week vs. never/rarely<br>≥ 24 grams/day vs. 0<br>grams/day | 0.82 (0.69,0.98)                           | 0.58 (0.33,1.02)                           | 0.09                                    |
| Alcohol intake                             | grams/day                                                           | 1.07 (0.76,1.49)                           | -                                          | -                                       |
| Smoking status                             | Ever vs. never smoker                                               | 0.88 (0.77,1.01)                           | 0.65 (0.42,1.00)                           | 0.16                                    |
| Diabetes                                   | Yes vs. no                                                          | 1.09 (0.86,1.37)                           | 1.80 (0.97,3.31)                           | 0.08                                    |
| 1st degree family history of breast cancer | Yes vs. no                                                          | 0.85 (0.68,1.06)                           | 2.13 (1.29,3.51)                           | 0.002                                   |
| 1st degree family history of other cancer  | Yes vs. no                                                          | 1.12 (0.98,1.29)                           | 1.43 (0.93,2.19)                           | 0.47                                    |

a Sensitivity analysis with restricted definition of Types I and II cases.

b Adjusted for age (continuous), OC use (ever/never), MHT use (ever/never), parity (nulliparous,1,2,3+), BMI (<30 vs 30+ kg/m<sup>2</sup>), menarche (<13, 13-14, 15+), age at menopause (premenopausal, <45, 45-49, 50-54, 55+ years), race (white/non-white) and smoking status (never, former, current smoker). Unknown/missing set as a separate category within each factor.

c P value from logistic regression of case-only analysis of histological types comparing each risk factor, adjusting for same covariates as above and person-years.

**Web Table 2. Sensitivity analysis of reclassification of grade 3+ endometrioid as Type II endometrial carcinoma in the NIH-AARP Diet and Health Study, 1995-2006**

|                                            |                                | Subtypes <sup>a</sup>    |                          | P <sub>heterogeneity</sub> <sup>c</sup> |
|--------------------------------------------|--------------------------------|--------------------------|--------------------------|-----------------------------------------|
|                                            |                                | Type I                   | Type II (n=291)          |                                         |
|                                            |                                | RR (95% CI) <sup>b</sup> | RR (95% CI) <sup>b</sup> |                                         |
| Age at menarche (years)                    | ≥15 vs. <13                    | 0.87 (0.70,1.08)         | 0.52 (0.31,0.87)         | 0.16                                    |
| Age at menopause (years)                   | ≥55 vs. <45                    | 2.24 (1.73,2.91)         | 1.27 (0.77,2.09)         | 0.07                                    |
| Menopausal hormone therapy                 | Ever vs. never user            | 1.20 (1.06,1.36)         | 0.92 (0.71,1.19)         | 0.010                                   |
| Duration of menopausal hormone therapy use | ≥10 years vs. never user       | 2.06 (1.72,2.47)         | 1.83 (1.29,2.61)         | 0.04                                    |
| Oral contraceptive use                     | Ever vs. never user            | 0.71 (0.62,0.81)         | 0.78 (0.60,1.02)         | 0.51                                    |
| Duration of oral contraceptive use         | ≥10 years vs. never user       | 0.60 (0.47,0.76)         | 0.61 (0.37,0.99)         | 0.45                                    |
| Parous                                     | Parous vs. nulliparous         | 0.68 (0.59,0.78)         | 0.75 (0.57,1.00)         | 0.50                                    |
| Age at first birth (years)                 | >30 vs. nulliparous            | 0.60 (0.46,0.79)         | 0.60 (0.35,1.04)         | 0.94                                    |
| Parity (births)                            | ≥ 3 vs. nulliparous            | 0.61 (0.52,0.71)         | 0.76 (0.56,1.03)         | 0.27                                    |
| Race                                       | Black vs. white                | 0.53 (0.38,0.75)         | 1.89 (1.26,2.83)         | <0.0001                                 |
| Education                                  | ≥ High school vs. <high school | 1.07 (0.94,1.22)         | 0.85 (0.66,1.09)         | 0.09                                    |
| Body mass index (kg/m <sup>2</sup> )       | ≥ 30 vs. <30                   | 3.04 (2.70,3.43)         | 2.04 (1.60,2.62)         | 0.0004                                  |
| Frequency of vigorous physical activity    | 3+ times/week vs. never/rarely | 0.79 (0.68,0.92)         | 0.67 (0.49,0.91)         | 0.34                                    |
| Alcohol intake                             | ≥ 24 grams/day vs. 0 grams/day | 1.03 (0.78,1.37)         | 0.56 (0.27,1.17)         | 0.38                                    |
| Smoking status                             | Ever vs. never smoker          | 0.87 (0.78,0.98)         | 0.82 (0.65,1.03)         | 0.87                                    |
| Diabetes                                   | Yes vs. no                     | 1.16 (0.95,1.41)         | 1.80 (1.28,2.55)         | 0.04                                    |
| 1st degree family history of breast cancer | Yes vs. no                     | 0.81 (0.66,0.98)         | 1.29 (0.93,1.79)         | 0.02                                    |
| 1st degree family history of other cancer  | Yes vs. no                     | 1.01 (0.89,1.14)         | 1.12 (0.88,1.43)         | 0.55                                    |

a Sensitivity analysis with re classification of grade3+ endometrioid adenocarcinoma and adenocarcinoma NOS as Types II cases.

b Adjusted for age (continuous), OC use (ever/never), MHT use (ever/never), parity (nulliparous,1,2,3+), BMI (<30 vs 30+ kg/m<sup>2</sup>), menarche (<13, 13-14, 15+), age at menopause (premenopausal, <45, 45-49, 50-54, 55+ years), race (white/non-white) and smoking status (never, former, current smoker). Unknown/missing set as a separate category within each factor.

c P value from logistic regression of case-only analysis of histological types comparing each risk factor, adjusting for same covariates as above and person-years.

**Web Table 3. Sensitivity analysis of endometrial carcinoma cases with stage data in the NIH-AARP Diet and Health Study, 1995-2006**

|                                            |                                | Stage                                                   |                                                         |                                         |                                                         |                                                         |                                         |
|--------------------------------------------|--------------------------------|---------------------------------------------------------|---------------------------------------------------------|-----------------------------------------|---------------------------------------------------------|---------------------------------------------------------|-----------------------------------------|
|                                            |                                | In Situ/Localized                                       |                                                         |                                         | Metastases/Distant                                      |                                                         |                                         |
|                                            |                                | Type I <sup>a</sup> (n=617)<br>RR (95% CI) <sup>b</sup> | Type II <sup>a</sup> (n=35)<br>RR (95% CI) <sup>b</sup> | P <sub>heterogeneity</sub> <sup>c</sup> | Type I <sup>a</sup> (n=124)<br>RR (95% CI) <sup>b</sup> | Type II <sup>a</sup> (n=31)<br>RR (95% CI) <sup>b</sup> | P <sub>heterogeneity</sub> <sup>c</sup> |
| Age at menarche (years)                    | ≥15 vs. <13                    | 0.81 (0.60,1.01)                                        | 0.25 (0.03,1.90)                                        | 0.35                                    | 0.40 (0.16,0.99)                                        | 0.61 (0.14,2.66)                                        | 0.80                                    |
| Age at menopause (years)                   | ≥55 vs. <45                    | 2.10 (1.46,3.03)                                        | 2.89 (0.58,14.46)                                       | 0.63                                    | 2.32 (1.12,4.79)                                        | 1.09 (0.22,5.46)                                        | 0.91                                    |
| Menopausal hormone therapy                 | Ever vs. never user            | 1.20 (1.01,1.42)                                        | 0.73 (0.35,1.55)                                        | 0.16                                    | 1.13 (0.77,1.66)                                        | 0.39 (0.15,1.00)                                        | 0.01                                    |
| Duration of menopausal hormone therapy use | ≥10 years vs. never user       | 2.33 (1.84,2.96)                                        | 2.61 (1.08,6.33)                                        | 0.63                                    | 1.67 (0.92,3.02)                                        | 0.27 (0.04,2.11)                                        | 0.01                                    |
| Oral contraceptive use                     | Ever vs. never user            | 0.71 (0.59,0.86)                                        | 1.11 (0.54,2.32)                                        | 0.33                                    | 0.61 (0.40,0.93)                                        | 0.83 (0.37,1.90)                                        | 0.38                                    |
| Duration of oral contraceptive use         | ≥10 years vs. never user       | 0.62 (0.45,0.86)                                        | 0.62 (0.14,2.72)                                        | 0.81                                    | 0.35 (0.14,0.88)                                        | 0.76 (0.17,3.34)                                        | 0.22                                    |
| Parous                                     | Parous vs. nulliparous         | 0.68 (0.56,0.82)                                        | 0.97 (0.40,2.37)                                        | 0.27                                    | 0.61 (0.41,0.92)                                        | 0.88 (0.36,2.17)                                        | 0.64                                    |
| Age at first birth (years)                 | >30 vs. nulliparous            | 0.57 (0.39,0.83)                                        | 0.37 (0.04,3.05)                                        | 0.66                                    | 0.64 (0.29,1.40)                                        | -                                                       | -                                       |
| Parity (births)                            | ≥ 3 vs. nulliparous            | 0.60 (0.49,0.74)                                        | 0.74 (0.27, 1.97)                                       | 0.49                                    | 0.59 (0.37,0.95)                                        | 1.01 (0.39, 2.60)                                       | 0.54                                    |
| Race                                       | Black vs. white                | 0.60 (0.38,0.94)                                        | 2.39 (0.82,6.97)                                        | 0.02                                    | 1.65 (0.86,3.20)                                        | 1.84 (0.54,6.01)                                        | 0.34                                    |
| Education                                  | ≥ High school vs. <high school | 1.16 (0.97,1.39)                                        | 0.68 (0.33,1.41)                                        | 0.09                                    | 0.94 (0.63,1.40)                                        | 0.73 (0.35,1.53)                                        | 0.41                                    |
| Body mass index (kg/m <sup>2</sup> )       | ≥ 30 vs <30                    | 3.08 (2.62,3.64)                                        | 1.80 (0.88,3.68)                                        | 0.14                                    | 2.51 (1.73,3.63)                                        | 1.88 (0.88,4.02)                                        | 0.22                                    |
| Frequency of vigorous physical activity    | 3+ times/week vs. never/rarely | 0.77 (0.63,0.94)                                        | 0.37 (0.15,0.95)                                        | 0.13                                    | 0.64 (0.38,1.09)                                        | 0.60 (0.23,1.54)                                        | 0.14                                    |
| Alcohol intake                             | ≥ 24 grams/day vs 0 grams/day  | 0.96 (0.66,1.38)                                        | -                                                       | -                                       | 0.85 (0.33,2.43)                                        | -                                                       | -                                       |
| Smoking status                             | Ever vs. never smoker          | 0.88 (0.75,1.04)                                        | 0.44 (0.21,0.90)                                        | 0.40                                    | 0.91(0.64,1.30)                                         | 0.93 (0.46,1.89)                                        | 0.87                                    |
| Diabetes                                   | Yes vs. no                     | 1.16 (0.89,1.52)                                        | 2.40 (0.95,6.05)                                        | 0.44                                    | 1.59 (0.93,2.74)                                        | 1.11 (0.33,3.77)                                        | 0.20                                    |
| 1st degree family history of breast cancer | Yes vs. no                     | 0.71 (0.54,0.93)                                        | 2.77 (1.28,5.99)                                        | 0.002                                   | 0.93 (0.53,1.63)                                        | 2.47 (1.10,5.54)                                        | 0.12                                    |
| 1st degree family history of other cancer  | Yes vs. no                     | 1.00 (0.85,1.18)                                        | 1.81 (0.90,3.63)                                        | 0.48                                    | 0.82 (0.56,1.21)                                        | 1.00 (0.48,2.11)                                        | 0.38                                    |

a Defined as in the main analysis.

b Adjusted for age (continuous), OC use (ever/never), MHT use (ever/never), parity (nulliparous,1,2,3+), BMI (<30 vs 30+ kg/m<sup>2</sup>), menarche (<13, 13-14, 15+ years), age at menopause (premenopausal, <45, 45-49, 50-54, 55+ years), and smoking status (never, former, current smoker). Unknown/missing set as a separate category within each factor.

c P value from logistic regression of case-only analysis of histological types comparing each risk factor, adjusting for same covariates as above and person-years.
